# Supplementary material
Source: PubMed Central journal article supplement (PMC6001586)
Supplement: AET2-2-10-s001.pdf [file AET2-2-10-s001.pdf]

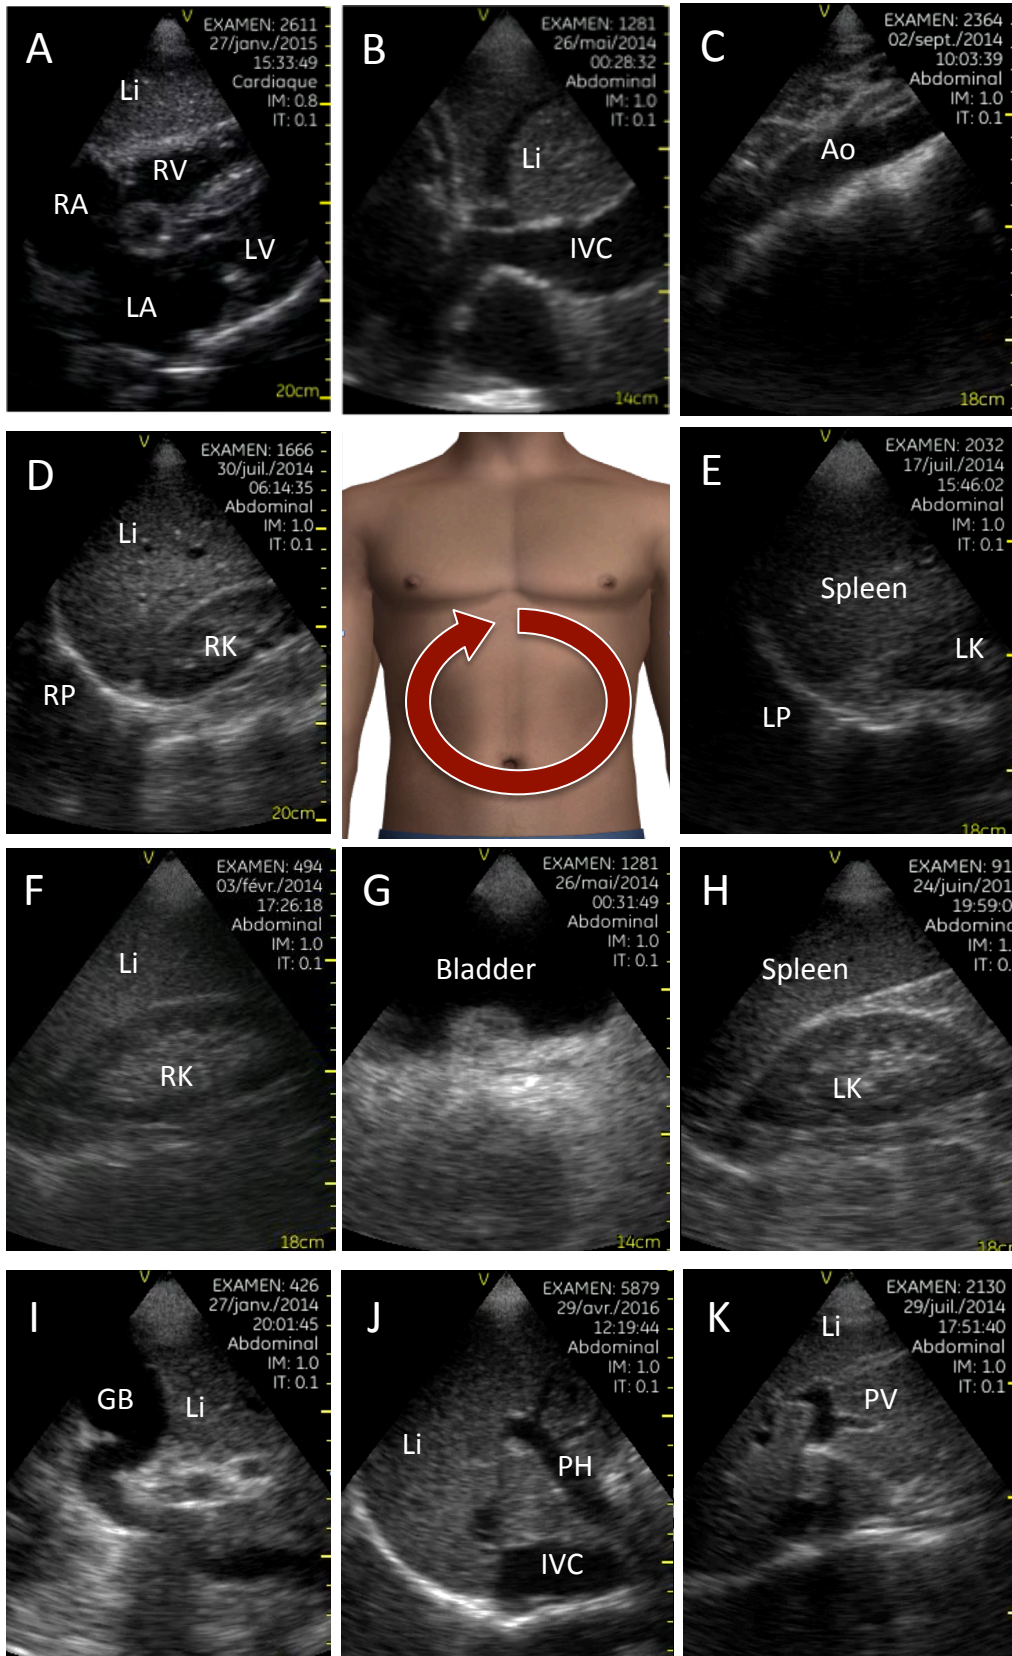

**Figure with the 11 views of interest:** subxyphoid (A), inferior vena cava (B), aorta (C), right pleura (D), left pleura (E), right kidney (F), bladder (G), left kidney (H), gallbladder (I), portal hilum (J) and portal veins (K). Ao = aorta; GB = gallbladder; IVC = inferior vena cava; LA = left atrium; Li = liver; LK = left kidney; LP = left pleura; LV = left ventricle; PH = portal hilum; PV = portal veins; RA = right atrium; RK = right kidney; RV = right ventricle
